# Supplementary material
Source: Research Square preprint supplement (doi:10.21203/rs.3.rs-10169306/v1)
Supplement: Supplementary file 1 [file edd5c21f85b3d95da78b1e72.docx]

The inclusion criteria of patients were as follows: patients with a single lesion histologically confirmed as IMCC; patients who underwent liver MRI examination [including T2WI-weighted imaging (T2WI),and diffusion-weighted imaging (DWI)] within 1 month before surgery; patients who did not receive any previous treatment for liver lesions or primary colorectal lesions. The exclusion criteria were as follows: other types of ICC (such as ICC with periductal infiltration or intraductal growth pattern); missing preoperative MRI data or data collected outside the specified time period; poor quality of MRI images due to severe artifacts or noise.

Table S1 MRI Acquisition Parameters for the Training and Test Datasets

| **Scanner** | **Sequence** | **TR/ TE (ms)** | **FOV**  **(mm)** | **Matrix** | **Sections Thickness**  **(mm)** | **Section Gap**  **(mm)** |
| --- | --- | --- | --- | --- | --- | --- |
| GE 3.0T (Discovery MR 750) | T2WI | (5000-8000)/(86-100) | (400, 300) | (320, 320) | 5 | 2.5 |
|  | DWI | (3000-7500)/(46-66) | (380, 300) | (128, 130) | 5 | 1 |
| UI 1.5T (uMR 588) | T2WI | (4500-6700)/(80-90) | (350, 350) | (320, 320) | 5 | 2 |
|  | DWI | (3085-7060)/(45-70) | (380, 300) | (128, 128) | 6 | 1 |
| GE 3.0T (Signa HDx) | T2WI | (3000-6000)/(67.6-85) | (350, 350) | (320, 224) | 5-6 | 2 |
|  | DWI | (7100-9230)/(66-79.6) | (400, 320) | (128, 128) | 6 | 1 |
| **Siemens 1.5T (Amira )** | T2WI | (2100)/(102) | (380, 380) | (128, 83) | 5 | 6 |
|  | DWI | (3900)/(66) | (380, 380) | (128, 83) | 5 | 6 |
| **Philips 1.5T (Achieva )** | T2WI | (334)/(65) | (402, 402) | (220, 252) | 7 | 8 |
|  | DWI | (1574)/(64) | (375, 375) | (124, 124) | 7 | 8 |

Table S2 MRI radiomics models based on different classifiers and different VOIs in the training cohort.

| **Training cohort** | | | **Indexes** | | | | | |
| --- | --- | --- | --- | --- | --- | --- | --- | --- |
| **ACC** | **AUC（95% CI ）** | **SEN** | **SPE** | **PPV** | **NPV** |
| DWI | 0 mm | RF | 0.952 | 0.989（0.975-1.000） | 0.967 | 0.913 | 0.967 | 0.913 |
| LR | 0.795 | 0.730（0.599-0.848） | 0.983 | 0.304 | 0.787 | 0.875 |
| XGBoost | 0.663 | 0.576（0.437-0.710） | 0.800 | 0.304 | 0.750 | 0.368 |
| GNB | 0.651 | 0.795（0.689-0.891） | 0.617 | 0.739 | 0.860 | 0.425 |
|  | 3 mm | RF | 0.976 | 0.996（0.989-1.000） | 1.000 | 0.913 | 0.968 | 1.000 |
|  | LR | 0.783 | 0.801（0.700-0.896） | 0.850 | 0.609 | 0.850 | 0.609 |
|  | XGBoost | 0.867 | 0.866（0.758-0.951） | 0.967 | 0.609 | 0.866 | 0.875 |
|  | GNB | 0.783 | 0.846（0.751-0.925） | 0.817 | 0.696 | 0.875 | 0.593 |
|  | 5 mm | RF | 0.976 | 0.996（0.987-1.000） | 1.000 | 0.913 | 0.968 | 1.000 |
|  | LR | 0.747 | 0.726（0.579-0.844） | 0.867 | 0.435 | 0.800 | 0.556 |
|  | XGBoost | 0.867 | 0.913（0.850-0.965） | 0.883 | 0.826 | 0.930 | 0.731 |
|  | GNB | 0.675 | 0.858（0.764-0.932） | 0.583 | 0.913 | 0.946 | 0.457 |
|  | 10 mm | RF | 0.964 | 0.991（0.977-1.000） | 1.000 | 0.870 | 0.952 | 1.000 |
|  | LR | 0.771 | 0.775（0.656-0.893） | 0.867 | 0.522 | 0.825 | 0.600 |
|  | XGBoost | 0.723 | 0.500（0.500-0.500） | 1.000 | 0 | 0.7239 | / |
|  | GNB | 0.771 | 0.843（0.749-0.921） | 0.850 | 0.565 | 0.836 | 0.591 |
|  | 15 mm | RF | 0.940 | 0.984（0.960-0.998） | 0.950 | 0.913 | 0.966 | 0.875 |
|  | LR | 0.783 | 0.772（0.641-0.875） | 0.867 | 0.565 | 0.839 | 0.619 |
|  | XGBoost | 0.277 | 0.823（0.722-0.903） | 0 | 1.000 | / | 0.277 |
|  | GNB | 0.747 | 0.813（0.692-0.910） | 0.833 | 0.522 | 0.820 | 0.545 |
|  | 20 mm | RF | 0.952 | 0.990（0.972-0.999） | 0.983 | 0.870 | 0.952 | 0.952 |
|  | LR | 0.783 | 0.794（0.679-0.894） | 0.867 | 0.565 | 0.839 | 0.619 |
|  | XGBoost | 0.867 | 0.900（0.824-0.961） | 0.917 | 0.739 | 0.902 | 0.773 |
|  | GNB | 0.795 | 0.896（0.814-0.956） | 0.817 | 0.739 | 0.891 | 0.607 |
| T2WI | 0 mm | RF | 0.936 | 0.951（0.863-0.997） | 0.951 | 0.882 | 0.967 | 0.833 |
|  | LR | 0.846 | 0.819（0.693-0.930） | 0.934 | 0.529 | 0.877 | 0.692 |
|  | XGBoost | 0.795 | 0.702（0.567-0.840） | 0.902 | 0.412 | 0.846 | 0.538 |
|  | GNB | 0.808 | 0.772（0.634-0.888） | 0.967 | 0.235 | 0.819 | 0.667 |
|  | 3 mm | RF | 0.962 | 0.987（0.965-1.000） | 1.000 | 0.824 | 0.953 | 1.000 |
|  | LR | 0.846 | 0.793（0.661-0.905） | 0.967 | 0.412 | 0.855 | 0.778 |
|  | XGBoost | 0.897 | 0.891（0.787-0.967） | 0.951 | 0.706 | 0.921 | 0.800 |
|  | GNB | 0.590 | 0.744（0.605-0.812） | 0.541 | 0.765 | 0.892 | 0.317 |
|  | 5 mm | RF | 0.974 | 0.959（0.875-1.000） | 1.000 | 0.882 | 0.968 | 1.000 |
|  | LR | 0.795 | 0.751（0.616-0.873） | 0.934 | 0.294 | 0.826 | 0.556 |
|  | XGBoost | 0.782 | 0.500（0.500-0.500） | 1.000 | 0 | 0.782 | / |
|  | GNB | 0.796 | 0.792（0.664-0.913） | 0.902 | 0.412 | 0.846 | 0.538 |
|  | 10 mm | RF | 0.962 | 0.960（0.878-1.000） | 1.000 | 0.824 | 0.953 | 1.000 |
|  | LR | 0.808 | 0.732（0.581-0.875） | 0.951 | 0.294 | 0.829 | 0.625 |
|  | XGBoost | 0.782 | 0.500（0.500-0.500） | 1.000 | 0 | 0.782 | / |
|  | GNB | 0.769 | 0.734（0.600-0.864） | 0.902 | 0.294 | 0.821 | 0.455 |
|  | 15 mm | RF | 0.949 | 0.952（0.856-0.998） | 0.984 | 0.824 | 0.952 | 0.933 |
|  | LR | 0.808 | 0.751（0.602-0.877） | 0.951 | 0.294 | 0.829 | 0.625 |
|  | XGBoost | 0.782 | 0.500（0.500-0.500） | 1.000 | 0 | 0.782 | / |
|  | GNB | 0.821 | 0.756（0.615-0.895） | 0.951 | 0.353 | 0.841 | 0.667 |
|  | 20 mm | RF | 0.962 | 0.982（0.953-1.000） | 1.000 | 0.824 | 0.953 | 1.000 |
|  | LR | 0.769 | 0.826（0.723-0.908） | 0.902 | 0.294 | 0.821 | 0.455 |
|  | XGBoost | 0.782 | 0.500（0.500-0.500） | 1.000 | 0 | 0.782 | / |
|  | GNB | 0.795 | 0.821（0.692-0.923） | 0.869 | 0.529 | 0.869 | 0.529 |
|  | 0 mm | RF | 0.940 | 0.976（0.943-0.998） | 0.969 | 0.842 | 0.954 | 0.889 |
| DWI+T2WI | LR | 0.855 | 0.832（0.726-0.933） | 0.984 | 0.421 | 0.851 | 0.889 |
|  | XGBoost | 0.771 | 0.756（0.642-0.876） | 1.000 | 0 | 0.771 | / |
|  | GNB | 0.795 | 0.727（0.593-0.846） | 0.934 | 0.316 | 0.822 | 0.600 |
|  | 3 mm | RF | 0.964 | 0.996（0.989-1.000） | 1.000 | 0.842 | 0.955 | 1.000 |
|  | LR | 0.807 | 0.817（0.701-0.920） | 0.938 | 0.368 | 0.833 | 0.636 |
|  | XGBoost | 0.735 | 0.860（0.756-0.947） | 0.703 | 0.842 | 0.938 | 0.457 |
|  | GNB | 0.747 | 0.870（0.776-0.948） | 0.734 | 0.789 | 0.922 | 0.469 |
|  | 5 mm | RF | 0.940 | 0.990（0.974-1.000） | 0.984 | 0.789 | 0.940 | 0.9375 |
|  | LR | 0.867 | 0.898（0.817-0.963） | 0.923 | 0.684 | 0.908 | 0.722 |
|  | XGBoost | 0.750 | 0.484（0.459-0.500） | 0.969 | 0 | 0.7659 | 0 |
|  | GNB | 0.398 | 0.739（0.588-0.871） | 0.219 | 1.000 | 1.000 | 0.275 |
|  | 10 mm | RF | 0.964 | 0.982（0.947-1.000） | 0.984 | 0.895 | 0.970 | 0.944 |
|  | LR | 0.952 | 0.989（0.970-1.000） | 0.969 | 0.895 | 0.969 | 0.895 |
|  | XGBoost | 0.904 | 0.954（0.914-0.988） | 0.891 | 0.947 | 0.983 | 0.720 |
|  | GNB | 0.482 | 0.873（0.774-0.955） | 0.328 | 1.000 | 1.000 | 0.306 |
|  | 15 mm | RF | 0.988 | 0.999（0.995-1.000） | 1.000 | 0.947 | 0.985 | 1.000 |
|  | LR | 0.831 | 0.806（0.687-0.902） | 0.969 | 0.368 | 0.838 | 0.778 |
|  | XGBoost | 0.771 | 0.863（0.794-0.923） | 0.719 | 0.947 | 0.979 | 0.500 |
|  | GNB | 0.747 | 0.605（0.451-0.743） | 0.906 | 0.211 | 0.795 | 0.400 |
|  | 20 mm | RF | 0.952 | 0.989（0.971-0.999） | 0.969 | 0.895 | 0.969 | 0.895 |
|  | LR | 0.229 | 0.518（0.354-0.695） | 0 | 1.000 | / | 0.229 |
|  | XGBoost | 0.771 | 0.499（0.390-0.618） | 1.000 | 0 | 0.771 | / |
|  | GNB | 0.723 | 0.631（0.482-0.777） | 0.860 | 0.263 | 0.797 | 0.357 |

Table S2 MRI radiomics models based on different classifiers and different VOIs in the testing cohort.

| **Testing cohort** | | | **Indexes** | | | | | |
| --- | --- | --- | --- | --- | --- | --- | --- | --- |
| **ACC** | **AUC（95% CI）** | **SEN** | **SPE** | **PPV** | **NPV** |
| DWI | 0 mm | RF | 0.667 | 0.625（0.404-0.817） | 0.875 | 0.250 | 0.700 | 0.500 |
| LR | 0.667 | 0.674（0.458-0.863） | 0.833 | 0.333 | 0.714 | 0.500 |
| XGBoost | 0.583 | 0.432（0.255-0.636） | 0.833 | 0.083 | 0.645 | 0.200 |
| GNB | 0.694 | 0.694（0.485-0.875） | 0.667 | 0.750 | 0.842 | 0.529 |
|  | 3 mm | RF | 0.639 | 0.715（0.540-0.881） | 0.708 | 0.500 | 0.739 | 0.462 |
|  | LR | 0.667 | 0.840（0.704-0.951） | 0.667 | 0.667 | 0.800 | 0.500 |
|  | XGBoost | 0.722 | 0.649（0.460-0.827） | 0.833 | 0.500 | 0.769 | 0.600 |
|  | GNB | 0.750 | 0.785（0.588-0.934） | 0.750 | 0.750 | 0.857 | 0.600 |
|  | 5 mm | RF | 0.722 | 0.677（0.473-0.853） | 0.875 | 0.417 | 0.750 | 0.625 |
|  | LR | 0.750 | 0.740（0.524-0.920） | 0.833 | 0.583 | 0.800 | 0.636 |
|  | XGBoost | 0.667 | 0.615（0.385-0.816） | 0.750 | 0.500 | 0.750 | 0.500 |
|  | GNB | 0.528 | 0.753（0.545-0.930） | 0.417 | 0.750 | 0.770 | 0.391 |
|  | 10 mm | RF | 0.806 | 0.785（0.614-0.944） | 0.958 | 0.500 | 0.793 | 0.857 |
|  | L | 0.833 | 0.788（0.584-0.967） | 0.917 | 0.667 | 0.846 | 0.800 |
|  | XGBoost | 0.667 | 0.500（0.500-0.500） | 1.000 | 0 | 0.667 | / |
|  | GNB | 0.778 | 0.865（0.701-0.971） | 0.875 | 0.583 | 0.808 | 0.700 |
|  | 15 mm | RF | 0.778 | 0.826（0.696-0.941） | 0.875 | 0.583 | 0.808 | 0.700 |
|  | LR | 0.722 | 0.757（0.571-0.913） | 0.750 | 0.667 | 0.818 | 0.571 |
|  | XGBoost | 0.333 | 0.549（0.365-0.746） | 0 | 1.000 | / | 0.333 |
|  | GNB | 0.778 | 0.861（0.723-0.971） | 0.792 | 0.750 | 0.864 | 0.643 |
|  | 20 mm | RF | 0.667 | 0.719（0.542-0.875） | 0.750 | 0.500 | 0.750 | 0.500 |
|  | LR | 0.694 | 0.802（0.633-0.935） | 0.750 | 0.583 | 0.783 | 0.538 |
|  | XGBoost | 0.611 | 0.689（0.498-0.853） | 0.708 | 0.417 | 0.708 | 0.417 |
|  | GNB | 0.778 | 0.899（0.783-0.978） | 0.797 | 0.750 | 0.864 | 0.643 |
| T2WI | 0 mm | RF | 0.735 | 0.589（0.374-0.803） | 0.917 | 0.300 | 0.759 | 0.600 |
|  | LR | 0.647 | 0.550（0.322-0.780） | 0.792 | 0.300 | 0.731 | 0.375 |
|  | XGBoost | 0.588 | 0.535（0.344-0.727） | 0.792 | 0.100 | 0.679 | 0.167 |
|  | GNB | 0.647 | 0.596（0.331-0.841） | 0.833 | 0.200 | 0.714 | 0.333 |
|  | 3mm | RF | 0.765 | 0.642（0.427-0.836） | 0.958 | 0.300 | 0.767 | 0.750 |
|  | LR | 0.706 | 0.667（0.418-0.867） | 0.792 | 0.500 | 0.792 | 0.500 |
|  | XGBoost | 0.706 | 0.623（0.418-0.837） | 0.917 | 0.200 | 0.733 | 0.500 |
|  | GNB | 0.471 | 0.508（0.265-0.762） | 0.375 | 0.700 | 0.750 | 0.318 |
|  | 5 mm | RF | 0.735 | 0.637（0.407-0.854） | 0.958 | 0.200 | 0.742 | 0.667 |
|  | LR | 0.735 | 0.667（0.418-0.866） | 0.875 | 0.400 | 0.778 | 0.571 |
|  | XGBoost | 0.706 | 0.500（0.500-0.500） | 1.000 | 0 | 0.706 | / |
|  | GNB | 0.706 | 0.575（0.329-0.818） | 0.875 | 0.300 | 0.750 | 0.500 |
|  | 10 mm | RF | 0.647 | 0.529（0.327-0.722） | 0.875 | 0.100 | 0.700 | 0.250 |
|  | LR | 0.735 | 0.650（0.421-0.850） | 0.917 | 0.300 | 0.759 | 0.600 |
|  | XGBoost | 0.706 | 0.500（0.500-0.500） | 1.000 | 0 | 0.706 | / |
|  | GNB | 0.706 | 0.742（0.542-0.920） | 0.875 | 0.300 | 0.750 | 0.500 |
|  | 15 mm | RF | 0.765 | 0.706（0.490-0.905） | 1.000 | 0.200 | 0.750 | 1.000 |
|  | LR | 0.676 | 0.579（0.342-0.811） | 0.833 | 0.300 | 0.741 | 0.429 |
|  | XGBoost | 0.706 | 0.500（0.500-0.500） | 1.000 | 0 | 0.706 | / |
|  | GNB | 0.647 | 0.454（0.202-0.684） | 0.833 | 0.200 | 0.714 | 0.333 |
|  | 20 mm | RF | 0.647 | 0.577（0.370-0.760） | 0.875 | 0.100 | 0.700 | 0.250 |
|  | LR | 0.735 | 0.746（0.563-0.923） | 0.917 | 0.300 | 0.759 | 0.600 |
|  | XGBoost | 0.706 | 0.500（0.500-0.500） | 1.000 | 0 | 0.706 | / |
|  | GNB | 0.706 | 0.646（0.417-0.853） | 0.875 | 0.300 | 0.750 | 0.500 |
|  | 0 mm | RF | 0.806 | 0.482（0.300-0.733） | 0.964 | 0.250 | 0.818 | 0.667 |
| DWI+T2WI | LR | 0.750 | 0.763（0.576-0.914） | 0.929 | 0.125 | 0.788 | 0.333 |
|  | XGBoost | 0.778 | 0.478（0.357-0.658） | 1.000 | 0 | 0.778 | / |
|  | GNB | 0.667 | 0.603（0.397-0.795） | 0.821 | 0.125 | 0.767 | 0.167 |
|  | 3 mm | RF | 0.806 | 0.763（0.537-0.936） | 0.893 | 0.500 | 0.862 | 0.571 |
|  | LR | 0.861 | 0.839（0.648-0.977） | 0.893 | 0.750 | 0.926 | 0.667 |
|  | XGBoost | 0.694 | 0.725（0.518-0.906） | 0.679 | 0.750 | 0.905 | 0.400 |
|  | GNB | 0.750 | 0.946（0.862-1.000） | 0.679 | 1.000 | 1.000 | 0.471 |
|  | 5 mm | RF | 0.750 | 0.478（0.235-0.726） | 0.893 | 0.250 | 0.806 | 0.400 |
|  | LR | 0.722 | 0.585（0.369-0.803） | 0.857 | 0.250 | 0.800 | 0.333 |
|  | XGBoost | 0.694 | 0.429（0.348-0.483） | 0.893 | 0 | 0.758 | 0 |
|  | GNB | 0.333 | 0.545（0.326-0.739） | 0.143 | 1.000 | 1.000 | 0.250 |
|  | 10 mm | RF | 0.722 | 0.656（0.416-0.871） | 0.893 | 0.125 | 0.781 | 0.250 |
|  | LR | 0.778 | 0.710（0.488-0.902） | 0.857 | 0.500 | 0.857 | 0.500 |
|  | XGBoost | 0.556 | 0.303（0.138-0.495） | 0.679 | 0.125 | 0.731 | 0.100 |
|  | GNB | 0.361 | 0.790（0.567-0.966） | 0.179 | 1.000 | 1.000 | 0.258 |
|  | 15 mm | RF | 0.833 | 0.772（0.563-0.942） | 0.929 | 0.500 | 0.867 | 0.667 |
|  | LR | 0.750 | 0.844（0.695-0.953） | 0.929 | 0.125 | 0.788 | 0.333 |
|  | XGBoost | 0.583 | 0.551（0.332-0.751） | 0.571 | 0.625 | 0.842 | 0.294 |
|  | GNB | 0.694 | 0.705（0.506-0.880） | 0.821 | 0.250 | 0.793 | 0.286 |
|  | 20 mm | RF | 0.750 | 0.781（0.613-0.913） | 0.893 | 0.250 | 0.806 | 0.400 |
|  | LR | 0.222 | 0.759（0.492-0.953） | 0 | 1.000 | / | 0.222 |
|  | XGBoost | 0.778 | 0.467（0.357-0.625） | 1.000 | 0 | 0.778 | / |
|  | GNB | 0.778 | 0.777（0.527-0.960） | 0.821 | 0.625 | 0.885 | 0.500 |

RF, Random Forest; LR, Logistic Regression; GNB, Gaussian Naive Bayes; ACC accuracy; PPV, positive predictive value; NPV, negative predictive value.

**Table S4** The Delong test results of the six different VOIs in the training cohort.

| **Modal** | **0 mm** | | **0+3 mm** | | **0+5 mm** | | **0+10 mm** | | **0+15 mm** | | **0+20 mm** | |
| --- | --- | --- | --- | --- | --- | --- | --- | --- | --- | --- | --- | --- |
| **Z-score** | ***P*-value** | **Z-score** | ***P*-value** | **Z-score** | ***P*-value** | **Z-score** | ***P*-value** | **Z-score** | ***P*-value** | **Z-score** | ***P*-value** |
| 0mm | / | | / | | / | | / | | / | | / | |
| 0+3mm | 3.207 0.001 | | / | | / | | 1.421 0.155 | | -0.523 0.601 | | -0.780 0.436 | |
| 0+5mm | 1.185 0.236 | | -1.807 0.071 | | / | | -2.661 0.008 | | -3.050 0.002 | | -1.069 0.285 | |
| 0+10mm | 4.400 0.000 | | / | | / | | / | | -0.911 0.362 | | / | |
| 0+15mm | 4.246 0.000 | | / | | / | | / | | / | | / | |
| 0+20mm | 2.702 0.007 | | / | | / | | 0.901 0.368 | | -0.880 0.379 | | / | |

**Table S5** The Delong test results of Clinical modal, Radiomics modal and Combined modal.

| **Modal** | **Clinical** | | **Radiomics** | | **Combined** | |
| --- | --- | --- | --- | --- | --- | --- |
| **Z-score** | ***P*-value** | **Z-score** | ***P*-value** | **Z-score** | ***P*-value** |
| Clinical | / | | -0.687 0.492 | | -5.389 ＜0.001 | |
| Radiomics | / | | / | | -2.373 0.017 | |
| Combined | / | | / | | / | |

**List of Abbreviations：**

| ICC | intrahepaticcholangiocarcinoma |
| --- | --- |
| IMCC | intrahepatic mass-forming cholangiocarcinoma |
| MVI | microvascular invasion |
| MRI | magnetic resonance imaging |
| VOI | volume of interest |
| AUC | area under curve |
| T2WI | T2-weighted imaging |
| DWI | Diffusion weighted imaging |
| PACS | picture archiving and communication system |
| DICOM | digital imaging and communications in medicine |
| LASSO | least-absolute shrinkage and selection operator |
| MRMR | maximum correlation minimum redundancy |
| RF | random forest |
| LR | logistic regression |
| GNB | Gaussian naive bayes |
| ROC | receiver operating characteristic |
| ACC | accuracy |
| SEN | sensitivity |
| SPE | specificity |
| PPV | positive predictive value |
| NPV | negative predictive value |
| DCA | decision curve analysis |
| GLCM | gray-level co-occurrence matrix |
| GLRLM | gray-level run length matrix |
| GLSZM | gray-level size zone matrix |
| NGTDM | neighboring gray tone difference matrix |
| GLDM | gray-level dependence matrix |
| CI | confidence interval |
| CA19-9 | carbohydrate antigen 19-9 |
| ADC | apparent diffusion coefficient |
